# Supplementary material for: Enhancement of adsorption selectivity for MOFs under mild activation and regeneration conditions
Source: Royal Society of Chemistry journal article supplement (doi:10.1039/c4cc00426d), 2014-01-01
Supplement: c4cc00426d1.pdf [file c4cc00426d1.pdf]

## Supplementary Information

### **Enhancement of adsorption selectivity for MOFs under mild activation and regeneration conditions**

Zheng Niu, Sheng Fang, Jian-Gong Ma\*, Xiao-Ping Zhang, and Peng Cheng\*

Department of Chemistry, Key Laboratory of Advanced Energy Material Chemistry (MOE) and Collaborative Innovation Center of Chemical Science and Engineering (Tianjin), Nankai University, Tianjin 300071 (P. R. China)

## Material and measurement

All chemical reagents were obtained from commercial sources and, unless otherwise noted, were used as received without further purification. Solvents were further purified following standard procedures prior to use. Elemental analysis was performed on a Perkin - Elmer 240 CHN elemental analyzer. IR spectra were recorded in the range 400 - 4000  $\text{cm}^{-1}$  on a Bruker TENOR 27 spectrophotometer by using KBr pellets. Powder X-ray diffraction measurements (PXRD) were recorded on a D/Max-2500 X-ray diffractometer using Cu-K $\alpha$  radiation. The simulated powder patterns were calculated by using Mercury 2.0. Thermogravimetric analysis was performed on a Labsys NETZSCH TG 209 Setaram apparatus with a heating rate of 10°C  $\text{min}^{-1}$  under a nitrogen atmosphere. All vapor-adsorption experiments were performed on a Quantachrome IQ<sub>2</sub> automatic volumetric instrument. All organic adsorbents in vapor-adsorption experiments were chromatographically pure and anhydrous. The vapor-sorption measurements were performed on the instrument that was equipped with a vapor generator at 298 K. The vapor-sorption isotherms were recorded in the pressure range  $10^{-3}$  - 0.9 P/P<sub>0</sub>.

**Synthesis of  $[\text{Eu}(\text{H}_2\text{CAM})_3]\cdot 5\text{H}_2\text{O}$ :** The mixture of  $\text{H}_3\text{CAM}$  ( $\text{H}_3\text{CAM}$  = chelidamic acid monohydrate, 0.3 mmol, 60.30 mg),  $\text{Eu}(\text{NO}_3)_3\cdot 6\text{H}_2\text{O}$  (0.1 mmol, 44.60 mg) and 2 mL DEF (N,N-diethylformamide) heated in 5mL glass vial at 90 °C for 7 days, and then cooled to room temperature at a rate of 2 °C h<sup>-1</sup>. The block yellow crystals were obtained in 48% yield based on Eu. Elemental analysis for  $[\text{Eu}(\text{H}_2\text{CAM})_3]\cdot 5\text{H}_2\text{O}$ , Calc. (%): C, 31.99; H, 2.81; N, 5.33. Found (%): 32.24; 2.75; 5.39. IR (KBr, cm<sup>-1</sup>): 3230 m, 2849 m, 2500 m, 2277w, 1343 s, 1153 s, 981 w, 835 w, 741 w, 689 w, 655 w, 521 m, 445 m.

**Synthesis of  $\{[\text{Eu}(\text{CAM})(\text{HCAM})_2\text{Mn}_2(\text{H}_2\text{O})_7]\cdot 7\text{H}_2\text{O}\}_n$  (**1**):**  $[\text{Eu}(\text{H}_2\text{CAM})_3]\cdot 5\text{H}_2\text{O}$  (0.1 mmol, 79.00 mg),  $\text{MnCl}_2\cdot 4\text{H}_2\text{O}$  (0.3 mmol, 59.37 mg), 4mL water were heated in 20 mL Teflon cup at 120 °C for 3 days, and then cooled to room temperature at a rate of 2 °C h<sup>-1</sup>. The rhomboidal colorless crystals were obtained in 76% yield based on Eu. Elemental analysis for **1**, Calc. (%): C, 23.88; H, 3.44; N, 3.98. Found (%): 23.50; 3.36; 3.84. IR (KBr, cm<sup>-1</sup>): 3405s, 2316w, 1569s, 1420s, 1352m, 1259w, 1124w, 1027s, 979w, 886w, 809m, 742s, 578m, 511w.

**Synthesis of  $\{[\text{Eu}(\text{CAM})(\text{HCAM})_2\text{Mn}_2(\text{H}_2\text{O})_7]\cdot \text{H}_2\text{O}\cdot 0.33\text{C}_2\text{H}_5\text{OH}\}_n$  (**2**):** **2** was obtained by exposing **1** in EtOH vapor atmosphere for 24 h. The transformation from single crystal **1** to single crystal **2** was confirmed by the X-ray crystallography. Elemental analysis for **2**, Calc (%): C, 27.01; H, 2.72; N, 4.36. Found (%): 26.68; 2.87; 4.52.

**Synthesis of  $\{[\text{Eu}(\text{CAM})(\text{HCAM})_2\text{Mn}_2(\text{CH}_3\text{OH})_3(\text{H}_2\text{O})_4]\cdot 2.08\text{H}_2\text{O}\cdot 0.25\text{CH}_3\text{OH}\}$  (**3**):** **3** was obtained by exposing **2** in MeOH vapor atmosphere for 24 h. The transformation from single crystal **2** to single crystal **3** was confirmed by the X-ray crystallography. Elemental analysis for **3**, Calc (%): C, 28.23; H, 3.16; N, 4.16. Found (%): 27.98; 3.21; 4.39.

### Crystallographic studies and refinement of the crystal structures

Crystallographic data of **1**, **2** and **3** were collected with an SuperNova, Single source at offset, Eos diffractometer with a Mo K $\alpha$  radiation ( $\lambda = 0.71073$  Å). All the structures were solved by direct methods and refined anisotropically by full-matrix least-squares techniques based on  $F^2$  using the SHELXS-97 and SHELXL-97 programs<sup>1</sup> contained on Olex 2. <sup>2</sup> Anisotropic thermal parameters were assigned to all non-hydrogen atoms. The hydrogen atoms of the ligand were generated geometrically; the hydrogen atoms of the water molecules were located in Fourier-difference electron density maps and refined with isotropic temperature factors. **1**, **2** and **3** crystalizes in monoclinic space group P21/n. Crystal data as well as details of data collection and refinement for the complexes are summarized in Table S1, S2 and S3. CCDC: 981839, 981840 and 981841 for **1**, **2** and **3**, respectively.

Table S1. Crystal data and structure refinement for **1**

|                                            |                                                                                                   |
|--------------------------------------------|---------------------------------------------------------------------------------------------------|
| CCDC No                                    | 981839                                                                                            |
| Chemical formula                           | C <sub>84</sub> H <sub>144</sub> Eu <sub>4</sub> Mn <sub>8</sub> N <sub>12</sub> O <sub>116</sub> |
| Formula weight                             | 4225.41                                                                                           |
| Radiation                                  | Mo K $\alpha$                                                                                     |
| Wavelength (Å)                             | 0.71073                                                                                           |
| Crystal system, space group                | monoclinic, P21/n                                                                                 |
| Unit cell parameter                        | a= 8.9816(14)    alpha=90<br>b= 24.4814(5)    beta=99.3878(15)<br>c= 17.3224(3)    gamma=90       |
| Volume (Å <sup>3</sup> )                   | 3757                                                                                              |
| Z, Calculated density (g/cm <sup>3</sup> ) | 1, 1.876                                                                                          |
| F(000)                                     | 2072                                                                                              |
| Crystal size (mm)                          | 0.5×0.3×0.2                                                                                       |
| Completeness (to theta)                    | 0.999 (25.01)                                                                                     |
| Refinement method                          | Full-matrix least-squares on F <sup>2</sup>                                                       |
| Goodness-of-fit on F <sup>2</sup>          | 1.095                                                                                             |

|                                      |                          |
|--------------------------------------|--------------------------|
| Final R indices [ $I > 2\sigma(I)$ ] | R = 0.0420, wR2 = 0.0984 |
| Largest diff. Peak and hole          | 0.912, -1.118            |

Table S2. Crystal data and structure refinement for **2**

|                                           |                                                                                             |
|-------------------------------------------|---------------------------------------------------------------------------------------------|
| CCDC No                                   | 981840                                                                                      |
| Chemical formula                          | $C_{86.67} H_{104} Eu_4 Mn_8 N_{12}$                                                        |
| Formula weight                            | 3854.46                                                                                     |
| Radiation                                 | Mo $K\alpha$                                                                                |
| Wavelength ( $\text{\AA}$ )               | 0.71073                                                                                     |
| Crystal system, space group               | monoclinic, P21/n                                                                           |
| Unit cell parameter                       | a= 9.019(11) $\alpha$ =90<br>b= 24.563(5) $\beta$ = 99.422(12)<br>c= 17.339(2) $\gamma$ =90 |
| Volume ( $\text{\AA}^3$ )                 | 3789                                                                                        |
| Z, Calculated density ( $\text{g/cm}^3$ ) | 1, 1.682                                                                                    |
| F(000)                                    | 1891                                                                                        |
| Crystal size (mm)                         | 0.5×0.3×0.2                                                                                 |
| Completeness (to $\theta$ )               | 0.993 (25.01)                                                                               |
| Refinement method                         | Full-matrix least-squares on $F^2$                                                          |
| Goodness-of-fit on $F^2$                  | 1.056                                                                                       |
| Final R indices [ $I > 2\sigma(I)$ ]      | R = 0.1031, wR2 = 0.2484                                                                    |

Table S3. Crystal data and structure refinement for **3**

|                                            |                                                                                                |
|--------------------------------------------|------------------------------------------------------------------------------------------------|
| CCDC No                                    | 981841                                                                                         |
| Chemical formula                           | C <sub>42</sub> H <sub>46</sub> Co <sub>4</sub> Gd <sub>2</sub> N <sub>6</sub> O <sub>45</sub> |
| Formula weight                             | 1905.06                                                                                        |
| Radiation                                  | Mo K $\alpha$                                                                                  |
| Wavelength (Å)                             | 0.71073                                                                                        |
| Crystal system, space group                | monoclinic, P21/n                                                                              |
| Unit cell parameter                        | a= 8.9103(3)    alpha=90<br>b= 24.1109(8)    beta=98.343(3)<br>c= 17.3062(6)    gamma=90       |
| Volume (Å <sup>3</sup> )                   | 3678                                                                                           |
| Z, Calculated density (g/cm <sup>3</sup> ) | 1, 1.815                                                                                       |
| F(000)                                     | 1991                                                                                           |
| Crystal size (mm)                          | 0.5×0.3×0.2                                                                                    |
| Completeness (to theta)                    | 0.998 (25.01)                                                                                  |
| Refinement method                          | Full-matrix least-squares on F <sup>2</sup>                                                    |
| Goodness-of-fit on F <sup>2</sup>          | 1.068                                                                                          |
| Final R indices [I>2sigma(I)]              | R = 0.0556, wR2 = 0.1291                                                                       |

1 G. M. Sheldrick, *Acta Cryst*, 2008, **A64**, 112-122

2. O. V. Dolomanov, L. J. Bourhis, R. J. Gildea, J. A. K. Howard and H. Puschmann, *J. Appl. Cryst.*, 2009, **42**, 339-341.

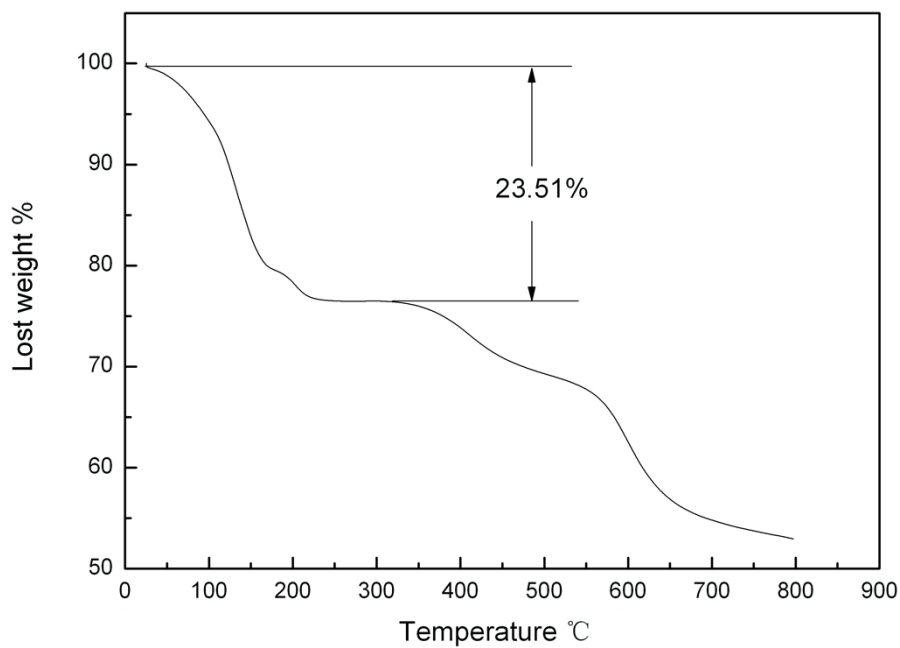

**Figure S1.** Thermogravimetric analysis of **1**. The 23.51% weight loss at 300 °C corresponds to the loss of fourteen water molecules per asymmetric unit (calculated 23.86%), which is also well consistent with the elemental analysis.

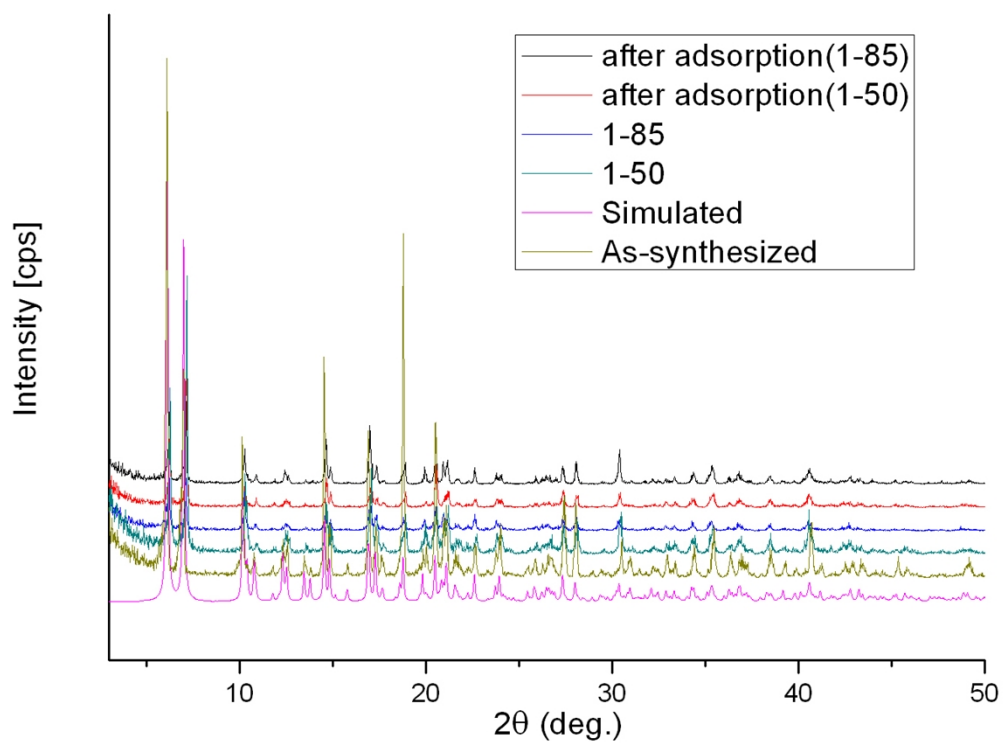

**Figure S2.** The powder XRD diffraction patterns of **1**, **1-50**, and **1-85**. The patterns after adsorption indicated that the framework of **1-50** and **1-85** unchanged in whole adsorption procedure.



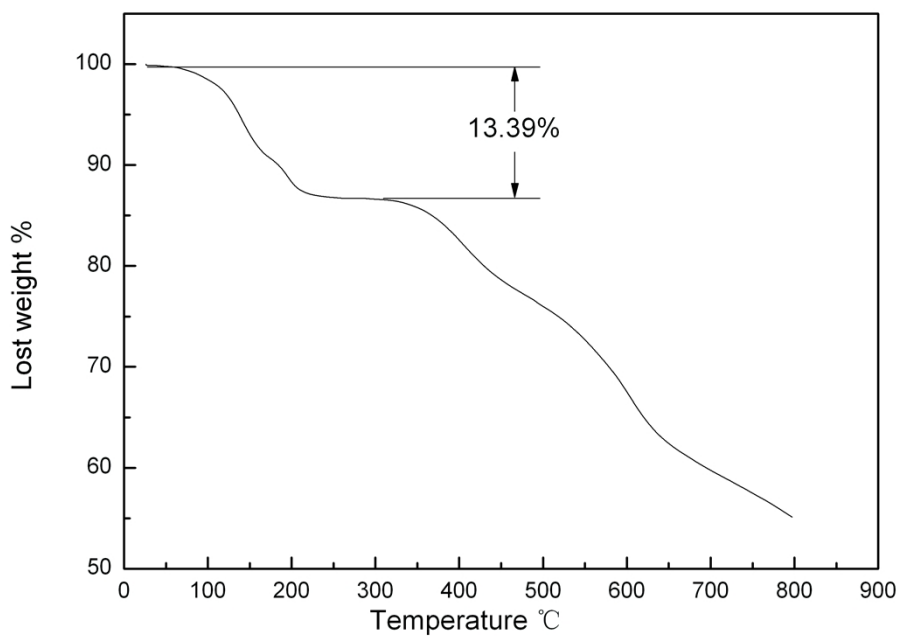

**Figure S3.** Thermogravimetric analysis of **1-50**. The 13.39 % weight loss at 300°C corresponds to the loss of seven water molecules per asymmetric unit of **1-50** (calculated 13.56%), which is also well consistent with the elemental analysis of **1-50** (Calc (%): C, 27.11; H, 2.38; N, 4.52. Found (%):27.23; 2.56; 5.02.).

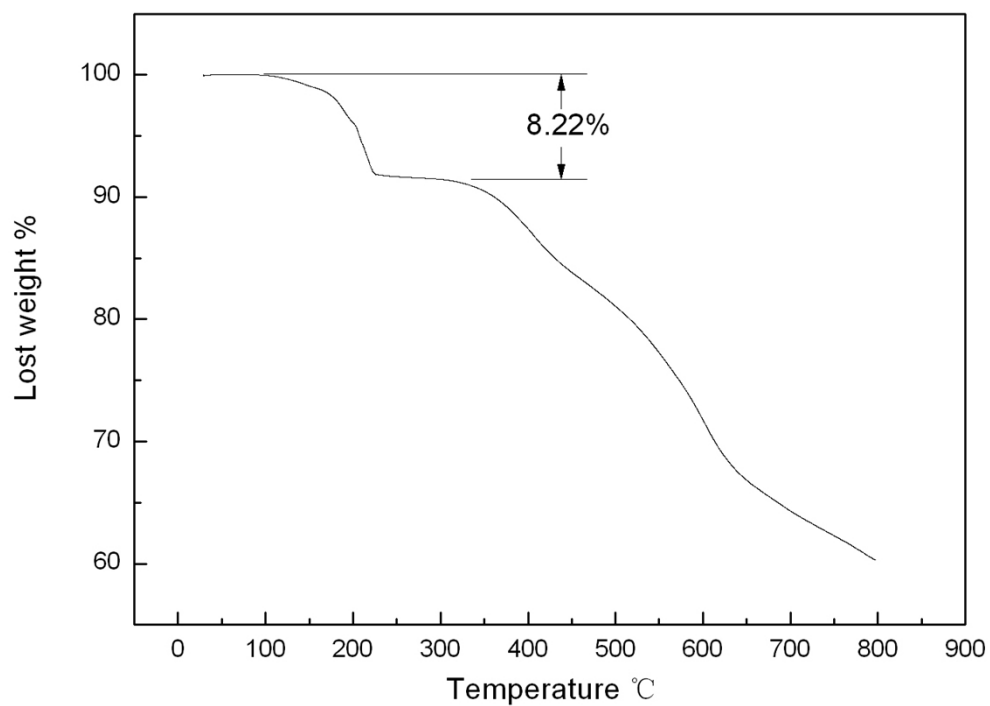

**Figure S4.** Thermogravimetric analysis of **1-85**. The 8.22 % weight loss at 300°C corresponds to the loss of three water molecules per asymmetric unit of **1-50** (calculated 8.21%), which is also well consistent with the elemental analysis of **1-85** (Calc. (%): C, 28.78; H, 1.84; N, 4.80. Found (%): 29.05; 1.90; 4.92.).

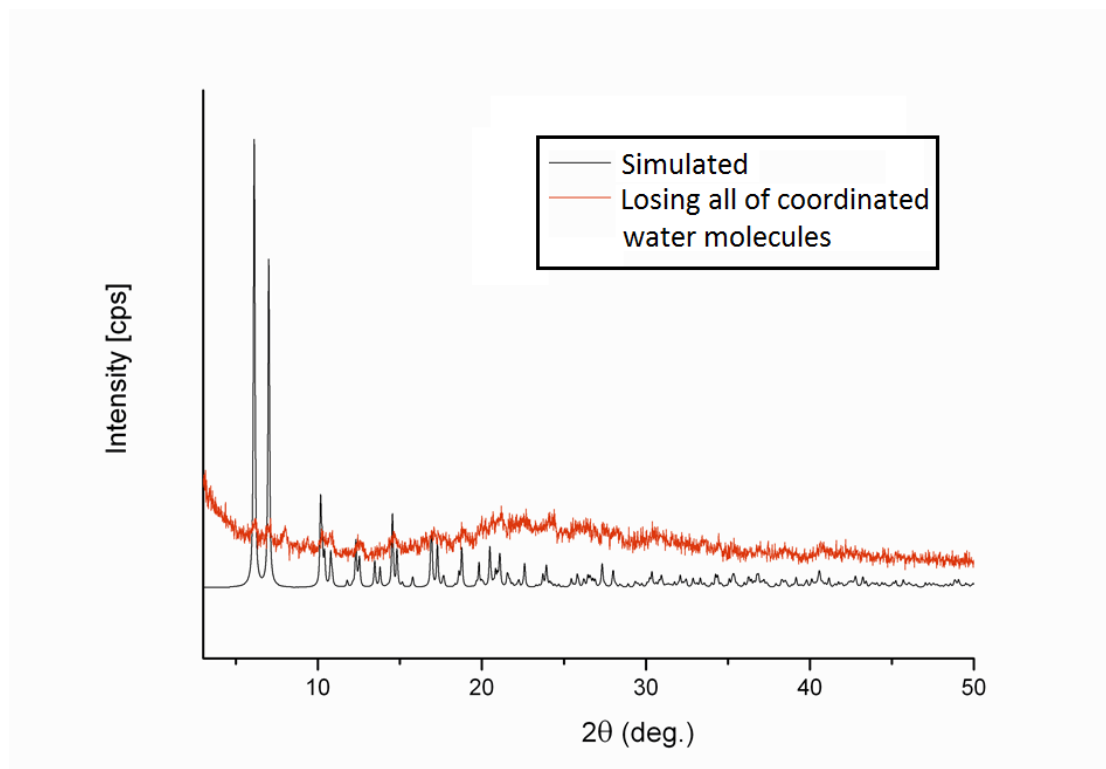

**Figure S5.** The powder XRD diffraction patterns of **1** with lost all of coordinated water molecules and the simulated patterns of **1**. The patterns indicated that the remove of all coordinated water molecules will cause the collapse of the framework of **1**.
